# Supplementary material
Source: HighWire-hosted journal article supplement (https://www.annfammed.org/highwire/filestream/8199/field_highwire_adjunct_files/0/Delaney_Supp_App.pdf)
Supplement: Delaney_Supp_App.pdf [file Delaney_Supp_App.pdf]

Delaney BC, Peterson KA, Speedie S, Taweel A, Arvanitis TN, Hobbs FDR. Envisioning a learning health care system: the electronic Primary Care Research Network. *Ann Fam Med*. 2012;10(1):54-59.

<http://www.annfammed.org/content/10/1/54/suppl/DC1>

## Supplemental Appendix. Glossary of Terms

|                |                                                                                                                                                                                                                                                                                                                                                                                                                                                                                                                                                                           |
|----------------|---------------------------------------------------------------------------------------------------------------------------------------------------------------------------------------------------------------------------------------------------------------------------------------------------------------------------------------------------------------------------------------------------------------------------------------------------------------------------------------------------------------------------------------------------------------------------|
| Metadata       | Data providing contextual information about other data, for example, units of measure, standards used to create data, source and creator of the data.                                                                                                                                                                                                                                                                                                                                                                                                                     |
| Xml            | Extensible markup language, a set of rules for creating meaningful computer readable text messages and used for purposes such as encoding documents in machine-readable format.                                                                                                                                                                                                                                                                                                                                                                                           |
| Globus Toolkit | The Globus Toolkit, currently at version 5, is an open source toolkit for building computing grids developed and provided by the Globus Alliance, University of Chicago, Chicago, Illinois.                                                                                                                                                                                                                                                                                                                                                                               |
| OGSA           | Open Grid Services Architecture: describes architecture for a service- oriented grid-computing environment for business and scientific use, developed within the Global Grid Forum (GGF). The Globus Toolkit implements OGSA.<br><a href="http://www.globus.org/ogsa/">http://www.globus.org/ogsa/</a>                                                                                                                                                                                                                                                                    |
| ISO11179       | An international standard for representing metadata in a metadata registry.<br><a href="http://metadata-stds.org/11179/">http://metadata-stds.org/11179/</a>                                                                                                                                                                                                                                                                                                                                                                                                              |
| PCROM          | The Primary Care Research Object Model, a domain model representing the concepts and the relationships between concepts necessary for the conduct of research studies in the primary care setting. <sup>17</sup>                                                                                                                                                                                                                                                                                                                                                          |
| BRIDG          | Biomedical Research Integrated Domain Group. A collaborative effort engaging stakeholders from the Clinical Data Interchange Standards Consortium (CDISC), the HL7 Regulated Clinical Research Information Management Technical Committee (RCRIM TC), the National Cancer Institute (NCI) and its Cancer Biomedical Informatics Grid (caBIG®), and the US Food and Drug Administration (FDA). The purpose of the BRIDG model is to develop a high level, integrating, model for all protocol-driven research. <a href="http://bridgmodel.org/">http://bridgmodel.org/</a> |
| caBIG          | Cancer bioinformatics Grid. A project funded by the US National cancer Institute to develop informatics tools for the cancer research field, these include vocabulary services, tools for data management and data integration.<br><a href="https://cabig.nci.nih.gov/">https://cabig.nci.nih.gov/</a>                                                                                                                                                                                                                                                                    |
| CDISC          | Clinical Data Interchange Standards Consortium, a global, open, multidisciplinary, non-profit organization that has established standards to support the acquisition, exchange, submission and archiving of clinical research data and metadata. Principal focus                                                                                                                                                                                                                                                                                                          |
